# Supplementary material for: AlzhCPI: A knowledge base for predicting chemical-protein interactions towards Alzheimer’s disease
Source: PLoS One. 2017 May 25;12(5):e0178347. doi: 10.1371/journal.pone.0178347 (PMC5460905; doi:10.1371/journal.pone.0178347)
Supplement: S5 Table — (XLSX) [file pone.0178347.s005.xlsx]

## Sheet: Sheet1 (2)
Table S5 Performance of 5-Fold Cross-Validation for seven sub-family targets towards Alzheimer disease Using NB and RP Classifiers
Sub-family targets	NB_ECFP6		RP_ECFP6		NB_MACCS		RP_MACCS
	MCC_ave	AUC_ave	MCC_ave	AUC_ave	MCC_ave	AUC_ave	MCC_ave	AUC_ave
Modulating neurotransmission (23)	0.984609	0.993696	0.872957	0.957174	0.775391	0.947	0.874435	0.942391
Tau pathology approach (9)	0.975444	0.997667	0.870889	0.952222	0.736667	0.935667	0.819222	0.921
Aβ-related treatment approaches (4)	0.952	0.9955	0.86025	0.94525	0.6735	0.931	0.8475	0.9165
Targeting intracellular signaling cascades (3)	0.990333	0.996	0.904333	0.970333	0.725	0.933333	0.872667	0.953
Anti-inflammatory approach (7)	0.96	0.995571	0.907857	0.967143	0.732714	0.940714	0.898714	0.965
Mitochondrial Dysfunction (2)	0.978	0.9955	0.9785	0.995	0.857	0.9715	0.9625	0.9915
Metabolic dysfunction approaches (3)	0.976	0.999	0.954333	0.986333	0.785333	0.952667	0.931333	0.984

## Sheet: Sheet1
Target	Type	NB_ECFP6		RP_ECFP6		NB_MACCS		RP_MACCS
		MCC	AUC	MCC	AUC	MCC	AUC	MCC	AUC
AChE	A	0.976	0.995	0.836	0.942	0.553	0.874	0.817	0.928
BuChE	A	0.982	0.998	0.892	0.975	0.652	0.917	0.918	0.971
α4-nAChR	A	0.996	0.995	0.934	0.976	0.759	0.971	0.858	0.973
α7-nAChR	A	0.978	0.994	0.845	0.955	0.655	0.921	0.861	0.948
Muscarnic M1	A	0.984	0.995	0.951	0.987	0.823	0.978	0.955	0.989
Muscarnic M2	A	0.984	0.999	0.877	0.976	0.779	0.963	0.928	0.978
NMDA	A	0.993	1	0.894	0.972	0.82	0.944	0.878	0.949
AMPA1	A	0.97	0.976	0.873	0.969	0.786	0.908	0.825	0.916
AMPA2	A	1	0.994	0.852	0.968	0.548	0.875	0.763	0.919
mGLU2	A	0.989	1	0.955	0.987	0.754	0.962	0.892	0.979
mGLU3	A	1	1	0.882	0.968	0.906	0.984	0.889	0.961
GABA-A	A	0.91	0.929	0.59	0.756	0.514	0.814	0.664	0.725
GABA-B	A	1	0.996	0.833	0.949	0.914	0.992	0.888	0.854
5HT1A	A	0.981	0.998	0.728	0.907	0.892	0.987	0.812	0.896
5HT2A	A	0.992	1	0.944	0.988	0.732	0.948	0.938	0.989
5HT3A	A	0.993	0.995	0.866	0.941	0.841	0.957	0.88	0.942
5HT4	A	0.986	0.998	0.892	0.975	0.872	0.984	0.925	0.974
5HT6	A	0.983	0.999	0.778	0.908	0.828	0.967	0.852	0.933
H3R	A	0.989	1	0.993	0.997	0.852	0.986	0.975	0.992
Aadenosine receptor A2A	A	0.989	1	0.947	0.989	0.89	0.981	0.984	0.995
Sigma 1 receptor	A	0.994	0.999	0.891	0.981	0.829	0.977	0.879	0.962
COMT	A	1	1	1	1	0.967	0.999	0.952	0.979
MAO-B	A	0.977	0.995	0.825	0.949	0.668	0.892	0.779	0.923
	Ave	0.984609	0.993696	0.872957	0.957174	0.775391	0.947	0.874435	0.942391
GSK3beta	B	0.977	0.997	0.868	0.949	0.463	0.863	0.729	0.872
CDK5	B	0.989	0.999	0.864	0.962	0.67	0.934	0.838	0.965
JNK1	B	0.991	1	0.916	0.973	0.707	0.941	0.893	0.966
JNK2	B	0.98	0.996	0.852	0.961	0.763	0.945	0.822	0.939
JNK3	B	0.952	0.993	0.866	0.956	0.65	0.915	0.849	0.943
MAPK p38α	B	1	1	0.905	0.935	0.916	0.98	0.795	0.897
HSP 90	B	0.975	0.997	0.928	0.984	0.689	0.941	0.911	0.97
PPIase Pin1	B	0.978	0.999	0.914	0.964	0.978	0.998	0.812	0.922
MAPT	B	0.937	0.998	0.725	0.886	0.794	0.904	0.724	0.815
	Ave	0.975444	0.997667	0.870889	0.952222	0.736667	0.935667	0.819222	0.921
APP	C	0.991	0.996	0.903	0.943	0.649	0.918	0.829	0.907
BACE1	C	0.966	0.998	0.93	0.976	0.575	0.914	0.894	0.965
gamma-seretase	C	1	1	0.929	0.981	0.79	0.969	0.914	0.965
Insulin-degrading enzyme	C	0.851	0.988	0.679	0.881	0.68	0.923	0.753	0.829
	Ave	0.952	0.9955	0.86025	0.94525	0.6735	0.931	0.8475	0.9165
PDE4A	D	0.994	0.998	0.947	0.97	0.65	0.912	0.861	0.954
PDE4B	D	0.983	0.991	0.853	0.971	0.586	0.895	0.81	0.934
PDE9A	D	0.994	0.999	0.913	0.97	0.939	0.993	0.947	0.971
	Ave	0.990333	0.996	0.904333	0.970333	0.725	0.933333	0.872667	0.953
COX-2	E	0.956	0.997	0.93	0.982	0.698	0.935	0.965	0.991
iNOS	E	0.976	0.999	0.886	0.968	0.702	0.929	0.887	0.97
Myeloperoxidae	E	0.956	0.996	0.914	0.963	0.781	0.956	0.918	0.953
IKK α	E	0.983	0.992	0.955	0.961	0.729	0.971	0.882	0.947
IKK β	E	0.993	1	0.932	0.983	0.775	0.954	0.905	0.967
TNF α	E	0.867	0.985	0.814	0.933	0.564	0.854	0.798	0.938
12-lipoxygenase	E	0.989	1	0.924	0.98	0.88	0.986	0.936	0.989
	Ave	0.96	0.995571	0.907857	0.967143	0.732714	0.940714	0.898714	0.965
Cyclophilin D	F	0.961	0.994	0.976	0.994	0.729	0.949	0.942	0.992
Pyruvate dehydrogenase kinase	F	0.995	0.997	0.981	0.996	0.985	0.994	0.983	0.991
	Ave	0.978	0.9955	0.9785	0.995	0.857	0.9715	0.9625	0.9915
HMG-CoA reductase	G	0.991	1	0.974	0.996	0.935	0.998	0.97	0.995
PPAR gamma	G	0.981	0.998	0.955	0.991	0.745	0.947	0.934	0.988
Cholesterol Acyltransferase	G	0.956	0.999	0.934	0.972	0.676	0.913	0.89	0.969
	Ave	0.976	0.999	0.954333	0.986333	0.785333	0.952667	0.931333	0.984
